# Supplementary material
Source: PubMed Central journal article supplement (PMC3840740)
Supplement: supp_0022155413502792_10.1369_0022155413502792_Supplemental_Material.pdf [file supp_0022155413502792_10.1369_0022155413502792_Supplemental_Material.pdf]

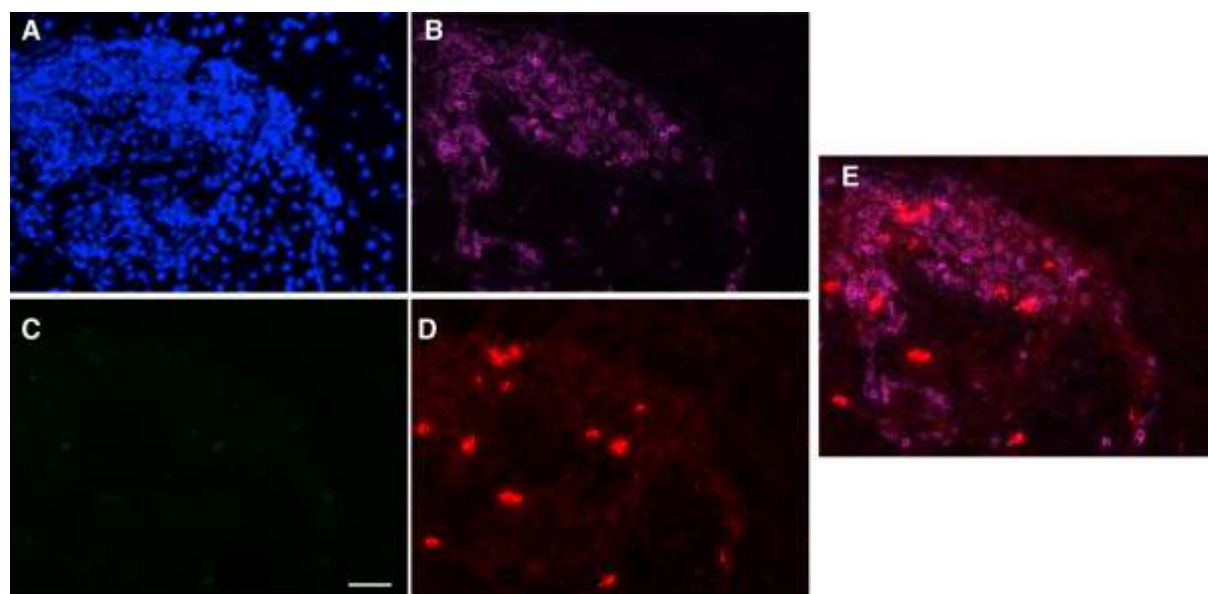

**Supplementary Figure 1.** Demonstration of non-specific staining with antiIgM secondary antibody in pancreatic sections of 10 wks old NOD mice. A: DAPI nuclear stain. B: Islets from 10 wks NOD mice were heavily infiltrated by mononuclear cells as evident from anti-CD3. C: Staining with secondary anti-IgG antibody (no primary anti-insulin antibody). D: Staining with secondary anti-IgM antibody (no primary IC2 antibody). E: Co-localization of anti-IgM staining with mononuclear cell infiltrate indicating the presence of IgM specificities in these invading cells.
